# Supplementary material
Source: Springer Nature journal article supplement (https://www.springermedizin.de/resource/supplementary/12911_2011_518_MOESM6_ESM.pdf/9525982)

Patients identified by the algorithm to have COPD

532

N=186 (35%)

GPs verified that patients do **not** to have COPD

346

65.0%

Patients verified by GP to have COPD

244

45.9%

102

19.1%

GP unsure that patient has COPD

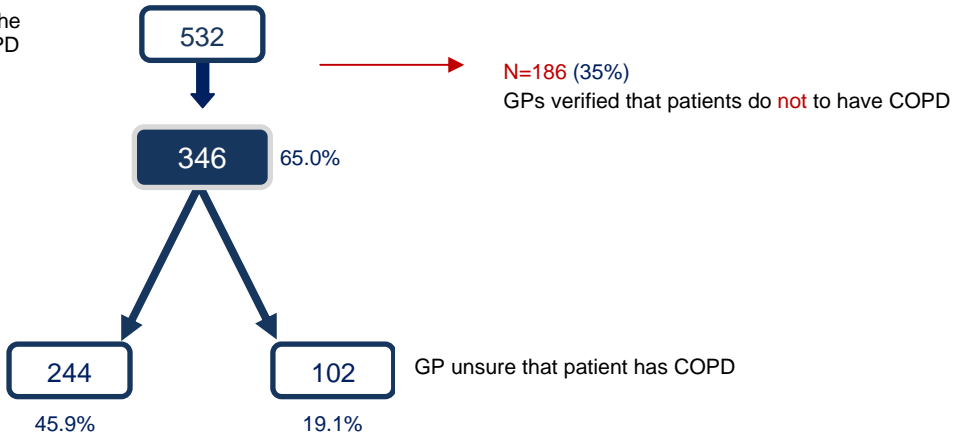

Supplement: MOESM6 [file 9525982]
